# Supplementary material for: Effectiveness of respiratory muscle training on pulmonary function recovery in patients with spinal cord injury: a systematic review and meta-analysis
Source: PeerJ journal article supplement (doi:10.7717/peerj.20373), 2025-11-28
Supplement: Search_Strategy_and_Data.zip [file Raw data.xlsx]

## Sheet: Basic Information on Literature
Title	Author,year	Study Area	Sample Size		Age		intervention		Frequency Intensity	Duration	outcomes
			Treatment group	Control group	Treatment group	Control group	Treatment group	Control group
Effect of Diaphragmatic Breathing Exercise With Biofeedback on Respiratory Function in Incomplete Cervical Spinal Cord Injury	Hasnakipour (2025)	Iran	20	20	33.10 ± 4.80	32.25 ± 5.43	RMT (Surface Electromyography Biofeedback Training)	Conventional intervention	3 d per week	5 weeks	FEV1, FVC, MVV
Feasibility of Oropharyngeal and Respiratory Muscle Training in Individuals with OSA and Spinal Cord Injury or Disease: A Pilot Study	Sankari (2024)	United States	8	10	66.3±10.0	64.8±7.7	RMT+Oropharyngeal training (Threshold training)	Sham therapy	30 times per day	13 weeks	FEV1,FVC,MIP,MEP,PEF
Effect of Respiratory Muscle Training on Load Sensations in People with Chronic Tetraplegia: A Secondary Analysis of a Randomised Controlled Trial	Luu (2023)	Australia	14	10	54±9.0	54±11.0	RMT (Threshold training)	Sham therapy	5 d per week	6 weeks	MIP,MEP,TLC,IC
Effects of Respiratory Muscle Training on Baroreflex Sensitivity, Respiratory Function, and Serum Oxidative Stress in Acute Cervical Spinal Cord Injury	Wang (2021)	China	20	24	46.1±14.0	44.8 ± 15.5	RMT (Dofin Respiratory Trainer)	Sham therapy	7 d per week	10 weeks	MIP,MEP,MVV
Effect of 4 Weeks Resistive Inspiratory Muscle Training on Respiratory Functions in Patients with Tetraplegia during In-Patient Rehabilitation.	Sikka (2021)	India	48	45	39.54±13.08	42.42±10.97	RMT (Resistance training)	Conventional intervention	5 d per week	4 weeks	FEV1,FVC,MIP,MEP,PEF,MVV
Impact of Respiratory Muscle Training on Respiratory Muscle Strength, Respiratory Function and Quality of Life in Individuals with Tetraplegia: A Randomised Clinical Trial	Boswell-Ruys (2020b)	Australia	30	31	51.5±14.3	55.7±14.9	RMT (Threshold training)	Sham therapy	5 d per week	6 weeks	FEV1,FVC,MIP,MEP,PEF,TLC,IC,VC
Respiratory Muscle Endurance Training with Normocapnic Hyperpnoea for Patients with Chronic Spinal Cord Injury: A Pilot Short-Term Randomized Controlled Trial	Xi (2019)	China	8	10	54.3±6.6	52.9±8.0	RMT (Carbon dioxide ventilation )	Conventional intervention	5 d per week	4 weeks	FEV1,FVC,TLC
Impact of Respiratory Muscle Training on Blood Gases and Pulmonary Function among Patients with Cervical Spinal Cord Injury	Abd El-Kader (2018)	Egypt	18	18	31.24±7.37	29.95±6.14	RMT (Resistance training)	Conventional intervention	5 d per week	6 weeks	FEV1,FVC
Short-Term Effects of Respiratory Muscle Training Combined with the Abdominal Drawing-in Maneuver on the Decreased Pulmonary Function of Individuals with Chronic Spinal Cord Injury: A Pilot Randomized Controlled Trial	Kim (1)(2017)	Korea	12	13	39.98±11.47	40.12±8.73	RMT (Resistance training)	Conventional intervention	3 d per week	8 weeks	FEV1,FVC
Short-Term Effects of Respiratory Muscle Training Combined with the Abdominal Drawing-in Maneuver on the Decreased Pulmonary Function of Individuals with Chronic Spinal Cord Injury: A Pilot Randomized Controlled Trial	Kim (2)(2017)	Korea	12	12	41.51±10.04	40.12±8.73	RMT (Stabilizers, abdominal traction training)	Conventional intervention	3 d per week	8 weeks	FEV1,FVC
Resistive Inspiratory Muscle Training in People with Spinal Cord Injury during Inpatient Rehabilitation: A Randomized Controlled Trial	Postma (2014)	Netherlands	19	21	47.1±14.1	46.6±14.9	RMT (Threshold training)	Conventional intervention	5 d per week	8 weeks	FEV1,FVC,MIP,MEP,PEF,MVV
Effects of Inspiratory Muscle Training on Exercise Responses in Paralympic Athletes with Cervical Spinal Cord Injury	West (2014)	United Kingdom	5	5	30.5±2.2	27.9±2.8	RMT (Threshold training)	Placebo	5 d per week	6 weeks	FEV1,FVC,MIP,MEP,PEF,MVV
Expiratory Muscle Training in Spinal Cord Injury: A Randomized Controlled Trial	Roth (2010)	United States	16	13	31.1±12.4	28.9±9.6	RMT (Resistance training)	Sham therapy	5 d per week	6 weeks	FEV1,FVC,MIP,MEP,TLC,IC
Resistive Inspiratory Muscle Training: Its Effectiveness in Patients with Acute Complete Cervical Cord Injury	Liaw (2000)	China	10	10	30.9±11.6	36.5± 11.5	RMT (DHD respiratory trainer)	Conventional intervention	7 d per week	6 weeks	FEV1,FVC,MIP,MEP, PEF,VC
Ventilatory Muscle Endurance Training in Quadriplegia: Effects on Breathing Pattern	Loveridge(1989)	Canada	6	6	31±4.1	35±12	RMT (Resistance training)	Conventional intervention	5 d per week	8 weeks	FVC,MIP,TLC,IC
A Comparison of Two Breathing Exercise Programs for Patients with Quadriplegia	Derrickson(1992)	United States	6	5	28.5±5.6	27±10.7	RMT (Resistance training)	Abdomen Weight Training	5 d per week	7 weeks	FVC,MIP ,PEF,MVV, IC
Comparison of Respiratory Muscle Training Methods in Individuals with Motor and Sensory Complete Tetraplegia: A Randomized Controlled Trial	Mueller(1)(2013)	Switzerland	8	8	35.2±12.7	41.6±17	RMT (Respifit S instrument)	Placebo	4 d per week	8 weeks	FEV1,MIP,MEP,PEF,MVV,TLC,VC
Comparison of Respiratory Muscle Training Methods in Individuals with Motor and Sensory Complete Tetraplegia: A Randomized Controlled Trial	Mueller(2)(2013)	Switzerland	8	8	33.5±11.7	41.6±17	RMT (Carbon dioxide ventilation)	Placebo	4 d per week	8 weeks	FEV1,MIP,MEP,PEF,MVV,TLC,VC
Comparison of Two Concurrent Respiratory Resistance Devices on Pulmonary Function and Time Trial Performance of Wheelchair Athletes	Litchke(1)(2010)	United States	4	7	26±7.8	29.1±4.3	RMT (PowerLung ® BreatheAir trainer)	Blank	5 d per week	9 weeks	MIP,MVV
Comparison of Two Concurrent Respiratory Resistance Devices on Pulmonary Function and Time Trial Performance of Wheelchair Athletes	Litchke(2)(2010)	United States	5	7	26.2±6.6	29.1±4.3	RMT (Respiratory impedance + Concurrent Flow Resistance training)	Blank	5 d per week	9 weeks	MIP,MVV
Effect of Singing on Respiratory Function, Voice, and Mood after Quadriplegia: A Randomized Controlled Trial	Tamplin(2013)	Australia	13	11	44±15	47±13	RMT (Neuromusic Therapy)	Music appreciation and relaxation	3 d per week	12 weeks	FEV1,FVC,MIP,MEP, TLC,IC,VC
Patients with Acute Spinal Cord Injury Benefit from Normocapnic Hyperpnoea Training	Van Houtte(1)(2008)	Belgian	7	7	40.57±13.96	44.14±14.74	RMT (Carbon dioxide ventilation)	Sham therapy	4 d per week	4 weeks	FVC,MIP,MEP,MVV
Patients with Acute Spinal Cord Injury Benefit from Normocapnic Hyperpnoea Training	Van Houtte (2)(2008)	Belgian	7	7	40.57±13.96	44.14±14.74	RMT (Carbon dioxide ventilation)	Sham therapy	4 d per week	8 weeks	FVC,MIP,MEP,MVV
Progressive Resistive Loading on Accessory Expiratory Muscles in Tetraplegia	Gounden (1990)	South African	20	20	31±7.33	34±10.23	RMT (PFLEX respiratory trainer)	Conventional intervention	6 d per week	8 weeks	MEP,VC
Progressive Resistive Loading on Accessory Expiratory Muscles in Tetraplegia	Soumyashree (2020)	Indian	15	12	29±12.6	34.4±13	RMT (resistance training)	Deep breathing exercises	5 d per week	4 weeks	MIP,MEP

## Sheet: norm
Forced expiratory volumein in 1 second		Treatment group			Control group
		M	SD	N	M	SD	N
1	Hasnakipour (2025)	1.64	0.29	20	1.14	0.42	20
2	Sankari （2024）	78.3	17.4	10	69.1	22.4	8
3	Sikka（2021）	2	0.13	48	1.62	0.13	48
4	Boswell-Ruys(2020)	1.8	0.8	29	1.9	0.8	31
5	Xi（2019）	65.6	19.5	9	52	10.9	9
6	Abd El-Kader（2018）	90.26	10.28	18	74.82	8.71	18
7	Kim（2017）（1）	2.5	0.16	13	2.09	0.74	12
8	Kim（2017）（2）	2.11	0.13	12	2.09	0.74	12
9	Karin（2014）	2.49	0.53	19	2.56	0.86	21
10	West（2014）	3.79	0.46	5	2.88	0.24	5
11	Roth（2010）	2	0.26	16	2.03	0.35	13
12	Liaw（2000）	1.6	0.4	10	1.7	0.8	10
13	Mueller(2013)	0.42	0.44	8	0.21	0.32	8
14	Mueller(2013)	0.26	0.26	8	0.21	0.32	8
15	Tamplin(2013)	2.57	0.64	13	2.27	0.9	11
Forced vital capacity		Treatment group			Control group
		M	SD	N	M	SD	N
1	Hasnakipour (2025)	1.94	0.36	20	1.56	0.44	20
2	Sankari （2024）	79.3	7.7	10	73.4	20.6	8
3	Sikka（2021）	2.05	0.14	48	1.73	0.12	48
4	Boswell-Ruys(2020)	2.5	1.1	29	2.6	1	31
5	Xi（2019）	66.6	30.1	9	56	14.7	9
6	Abd El-Kader（2018）	62.17	9.54	18	47.63	8.12	18
7	Kim（2017）（1）	2.6	0.19	13	2.02	0.44	12
8	Kim（2017）（2）	2.4	0.69	12	2.02	0.44	12
9	Karin（2014）	3.11	0.81	19	3.58	1.1	21
10	West（2014）	4.86	0.4	5	3.33	0.26	5
11	Roth（2010）	2.18	0.28	16	2.23	0.34	13
12	Liaw（2000）	1.8	0.4	10	1.9	0.9	10
13	Loveridge（1989）	64	10	6	75	23	6
14	Derrickson (1992)	1.36	0.5	6	1.18	0.61	5
15	Tamplin(2013)	3.11	0.78	13	2.71	1.01	11
16	Van Houtte(2008)	3.5	0.6	7	3.6	0.7	7
17	Van Houtte(2008)	3.7	0.5	7	3.2	0.6	7
Maximum inspiratory pressure		Treatment group			Control group
		M	SD	N	M	SD	N
1	Sankari （2024）	128.3	27.8	10	81.7	24.1	8
2	Billy(2023)	-69	29	14	-56	17	10
3	Wang（2021）	-101.8	41	20	-89.1	34.8	24
4	Sikka（2021）	45.1	5.31	48	29.79	6.68	48
5	Boswell-Ruys(2020)	63.7	24	29	54.9	21.3	31
6	Karin（2014）	82.2	24.5	19	74.1	28.5	21
7	West（2014）	-135	15	5	-116	15	5
8	Roth（2010）	-71	-24	16	-56	-5	13
9	Liaw（2000）	58.6	16.7	10	63.1	17.9	10
10	Loveridge（1989）	100.7	19.3	6	105.3	16.3	6
11	Derrickson (1992)	-34.83	17	6	-20.8	13	5
12	Mueller(2013)	35.38	29.43	8	8.88	15.21	8
13	Mueller(2013)	7	10.03	8	8.88	15.21	8
14	Litchke（2010）	-94.5	26.1	4	-88.29	23.96	7
15	Litchke（2010）	-106.4	16.09	5	-88.29	23.96	7
16	Tamplin(2013)	88.9	20.39	13	75.3	26.68	11
17	Van Houtte(2008)	-81	12	7	-60	11	7
18	Van Houtte(2008)	-89	11	7	-66	10	7
19	Soumyashree(2020)	-110	14.6	15	-78.3	27.5	12
Maximum expiratory pressure		Treatment group			Control group
		M	SD	N	M	SD	N
1	Sankari （2024）	97.3	36.6	10	66.8	27.8	8
2	Billy(2023)	29	12	14	35	14	10
3	Wang（2021）	92.6	45.9	20	94.1	36.3	24
4	Sikka（2021）	29.68	5.2	48	20.1	5.41	48
5	Boswell-Ruys(2020)	38.4	21.7	29	37.4	17.8	31
6	Karin（2014）	52.3	24.3	19	64.6	31.1	21
7	West（2014）	94	19	5	71	15	5
8	Roth（2010）	98	35	16	59	8	13
9	Liaw（2000）	39.7	18.8	10	40.9	8.9	10
10	Mueller(2013)	7.5	14.73	8	3.25	13.27	8
11	Mueller(2013)	8.5	39.41	8	3.25	13.27	8
12	Tamplin(2013)	86.6	37.96	13	91.2	35.04	11
13	Van Houtte(2008)	57	12	7	34	10	7
14	Van Houtte(2008)	61	13	7	39	12	7
15	Gounden（1990）	68.05	23.28	20	46.45	19.9	20
16	Soumyashree(2020)	62.6	20.5	15	49.1	17.2	12
17	Gounden(1990)	68.05	23.28	20	46.45	19.91	20
Peak expiratory Flow		Treatment group			Control group
		M	SD	N	M	SD	N
1	Sankari （2024）	79.3	13.5	10	58.9	26.9	8
2	Sikka（2021）	2.21	0.11	48	1.84	0.13	48
3	Boswell-Ruys(2020)	4.7	1.6	29	4.7	1.8	31
4	Karin（2014）	5.04	1.77	19	4.84	1.7	21
5	West（2014）	6.61	2.54	5	6.37	1.52	5
6	Liaw（2000）	3.5	1.1	10	3.9	1.9	10
7	Derrickson (1992)	1.4	0.62	6	1.54	0.71	5
8	Mueller(2013)	1.18	1.22	8	0.57	0.94	8
9	Mueller(2013)	0.44	0.49	8	0.57	0.94	8
Minute ventilation volume		Treatment group			Control group
		M	SD	N	M	SD	N
1	Hasnakipour (2025)	33.5	5.01	20	28.22	7.06	20
2	Wang（2021）	14.8	5.5	20	10.2	4.9	24
3	Sikka（2021）	51.27	7.9	48	41.73	7.05	48
4	Karin（2014）liters/min	74.1	28.4	19	69.3	32.2	21
5	West（2014）(L/min)	141	20	5	122	5	5
6	Derrickson (1992)	42.8	28	6	23.6	12	5
7	Mueller(2013)	16.28	17.45	8	6.95	14.62	8
8	Mueller(2013)	15.96	15.1	8	6.95	14.62	8
9	Litchke（2010）	113.05	33.25	4	133.01	38.08	7
10	Litchke（2010）	121.38	22.37	5	133.01	38.08	7
11	Van Houtte(2008)	132	22	7	84	17	7
12	Van Houtte(2008)	148	23	7	94	16	7
Total lung capacity
Total lung capacity		Treatment group			Control group
		M	SD	N	M	SD	N
1	Billy(2023)	4.7	1.5	14	4.8	1.1	10
2	Boswell-Ruys(2020)	5.1	1.3	29	4.9	1.2	31
3	Xi（2019）	74.6	24.8	9	72.6	10.5	9
4	Roth（2010）	4.13	-0.04	16	4.31	0.29	13
5	Liaw（2000）	4.6	0.6	10	4	1	10
6	Loveridge（1989）	82	6.9	6	91.6	17	6
7	Mueller(2013)（1）	0.1	0.76	8	-0.25	0.81	8
8	Mueller(2013)（2）	0.1	0.76	8	-0.25	0.81	8
9	Tamplin(2013)	5.35	0.98	13	4.8	1.56	11
Inspiratory capacity		Treatment group			Control group
		M	SD	N	M	SD	N
1	Billy(2023)	1.9	0.8	14	2.1	0.5	10
2	Boswell-Ruys(2020)	2	0.8	29	2.1	0.8	31
3	Roth（2010）	1.6	0.01	16	1.52	0.04	13
4	Loveridge（1989）%	95	15	6	104	27	6
5	Derrickson (1992)	1.61	0.47	6	1.24	0.54	5
6	Tamplin(2013)	2.44	0.59	13	1.95	0.75	11
Vital capacity		Treatment group			Control group
		M	SD	N	M	SD	N
1	Billy(2023)	2.3	1.1	14	2.6	0.8	10
2	Boswell-Ruys(2020)	2.5	1	29	2.7	1.1	31
3	Liaw（2000）	2	0.5	10	1.9	0.9	10
4	Mueller(2013)	0.46	0.44	8	0.32	0.45	8
5	Mueller(2013)	0.34	0.31	8	0.32	0.45	8
6	Tamplin(2013)	2.96	0.89	13	2.49	0.89	11
